# Supplementary material for: A CDK1 phosphorylation site on Drosophila PAR-3 regulates neuroblast polarisation and sensory organ formation
Source: eLife journal article supplement (doi:10.7554/elife.97902), 2024-06-12
Supplement: supp [file elife_poa_e97902_Transparent_Reporting_File.docx]

| **Key Resources Table** | | | | |
| --- | --- | --- | --- | --- |
| **Reagent type (species) or resource** | **Designation** | **Source or reference** | **Identifiers** | **Additional information** |
| gene (*Drosophila melanogaster*) | mira::mCherry | CrispR edited  locus by Januschke lab | Ramat et al, 2017 |  |
| gene (*Drosophila melanogaster*) | baz::mScarlet-I | CrispR edited  locus by Januschke lab | Houssin et al., 2021 |  |
| gene (*D. melanogaster*) | cdk1as2 | CrispR edited  locus by Januschke lab | This study |  |
| transgenegene (*D. melanogaster*) | Baz::GFP | Bloomginton Stock Center | BDSC 51572 |  |
| transgene (*D. melanogaster*) | ubi-bazΔLB::GFP |  | Kullmann and Krahn, 2018 |  |
| transgene (*D. melanogaster*) | ubi-bazΔOD::GFP |  | Kullmann and Krahn, 2018 |  |
| transgene (*D. melanogaster*) | ubi-his2av::mRFP | Gonzalez lab | Gift from Cayetano Gonzalez |  |
| transgene (*D. melanogaster*) | UASz-bazWT::GFP |  | This study |  |
| transgene (*D. melanogaster*) | UASz-bazS180A::GFP |  | This study |  |
| transgene (*D. melanogaster*) | UASz-bazS180D::GFP |  | This study |  |
| transgene (*D. melanogaster*) | Neur-*GAL4* | Bloomington stock center | BDSC 80575 |  |
| transgene (*D. melanogaster*) | Pnr-GAL4 | Bloomington stock center | BDSC 3039 |  |
| transgene (*D. melanogaster*) | UAS-RFP RNAi | Bloomington stock center | BDSC 67852 |  |
| transgene (*D. melanogaster*) | UAS-dl RNAi | Bloomington stock center | BDSC 28032 |  |
| transgene (*D. melanogaster*) | cycB::GFP | Bloomington stock center | BDSC 51568 |  |
| transgene (*D. melanogaster*) | cycB3::GFP | Bloomington stock center | BDSC 91673 |  |
| transgene (*D. melanogaster*) | Neur-GAL4, UAS-Pon::RFP |  | Emery et al., 2005 |  |
| transgene (*D. melanogaster*) | delta::GFP | Bloomington stock center | BDSC 59819 |  |
| chemical compound, drug | 1-NAPP-1 | Sigma Aldrich | 529579 |  |
| antibody | affinity purified  Baz-PS180 antibody | sheep | This study | YAGGDS*PERLF – (where S* is phospho-Serine) |
| antibody | Affinity purified Numb antibody | sheep | This study | GST-full length Numb protein (CG3779-PA) used as antigen |
| antibody | Affinity purified Mira antibody | sheep | This study | RLFRTPSLPQRLR peptide used as antigen |
| antibody | Affinity purified Mira antibody | rabbit | Ramat et al., 2017 |  |
| antibody | rabbit anti-PKCζ | Santa Cruz | sc-17781 |  |
| antibody | Mouse anti-Cyclin A | DSHB | DSHB A12 |  |
| antibody | Mouse anti-Su(H) | Santa Cruz | sc-398453 AF647 |  |
| antibody | Mouse anti-Cut | DSHB | DSHB 2B10 |  |
| plasmid | UASz 1.0 | DGRC | DGRC 1431 |  |
