# Supplementary material for: A CDK1 phosphorylation site on Drosophila PAR-3 regulates neuroblast polarisation and sensory organ formation
Source: eLife. 2024 Jun 13;13:e97902. doi: 10.7554/eLife.97902 (PMC11216751; doi:10.7554/eLife.97902)
Supplement: Supplementary file 1. — Bold text: very good position assignment. Red text: phosphorylation also observed in the absence of CDK1/CyclinB1. [file elife-97902-supp1.xlsx]

## Sheet: Baz PARD3 Phosphopeptides
Drosophila Baz (2-320)
Repeat	± CDK1	Phosphopeptide	Position	Modification	Observed	Mr(calc)	Mascot Score
Reaction 1	- CDK1	No phosphopeptides identified	N/A	N/A	N/A	N/A	N/A
	+ CDK1	R.RSSDPNLLASLK.A + Phospho (ST)	S150, S151	Phosphorylation (ST)	690.849	1379.68	26
		R.SSDPNLLASLKAEGSNKR.W + Phospho (ST)	S158	Phosphorylation (ST)	492.496	1965.95	24
		R.WSAAAPHYAGGDSPER.L + Phospho (ST)	S180	Phosphorylation (ST)	876.362	1750.71	41
		R.WSAAAPHYAGGDSPER.L + Phospho (ST)	S180	Phosphorylation (ST)	584.578	1750.71	35
Reaction 2	- CDK1	No phosphopeptides identified	N/A	N/A	N/A	N/A	N/A
	+ CDK1	R.WSAAAPHYAGGDSPER.L + Phospho (ST)	S180	Phosphorylation (ST)	584.577	1750.71	24
Human PARD3 (2-281)
Repeat	± CDK1	Phosphopeptide	Position	Modification	Observed	Mr(calc)	Mascot Score
Reaction 1	- CDK1	R.DTSNWSNQFQR.D	206,207, 210	Phosphorylation (ST)	731.795	1461.57	39
	+ CDK1	K.QNTAGSPKTCDR.K	187	Phosphorylation (ST)	707.793	1413.57	47
		R.DTSNWSNQFQR.D	210	Phosphorylation (ST)	731.792	1461.57	37
		R.DTSNWSNQFQR.D	206,207, 210	Phosphorylation (ST)	731.797	1461.57	23
		R.DTSNWSNQFQRDNAR.S	210	Phosphorylation (ST)	640.267	1917.78	37
		R.DNARSSLSASHPMVGK.W	220221	Phosphorylation (ST)	579.598	1735.77	35
		R.SSLSASHPMVGK.W	223, 225	Phosphorylation (ST)	640.79	1279.56	36
		R.SSLSASHPMVGK.W	221, 223	Phosphorylation (ST), oxydation (M)	648.787	1295.56	19
Reaction 2	- CDK1	R.DTSNWSNQFQR.D	206207	Phosphorylation (ST)	731.795	1461.57	29
	+ CDK1	K.QNTAGSPKTCDR.K + Phospho (ST)	187	Phosphorylation (ST)	707.795	1413.57	33
		K.QNTAGSPKTCDRK.K + Phospho (ST)	187, 190	Phosphorylation (ST)	771.844	1541.67	19
		R.DTSNWSNQFQR.D + Phospho (ST)	210	Phosphorylation (ST)	731.792	1461.57	60
		R.DNARSSLSASHPMVGK.W + Phospho (ST)	220221	Phosphorylation (ST)	579.599	1735.77	35
		R.SSLSASHPMVGK.W + Oxidation (M); Phospho (ST)	221, 223	Phosphorylation (ST), oxydation (M)	648.788	1295.56	29
Bold S, T: very good position assignment
S, T: position is not certain
Red: phosphorylation also observed in the absence of CDK1/CyclinB
