# Supplementary material for: A CDK1 phosphorylation site on Drosophila PAR-3 regulates neuroblast polarisation and sensory organ formation
Source: eLife. 2024 Jun 13;13:e97902. doi: 10.7554/eLife.97902 (PMC11216751; doi:10.7554/eLife.97902)
Supplement: Supplementary file 3. [file elife-97902-supp3.xlsx]

## Sheet: Origins of stocks
Stock	Origin
baz::GFP	BDSC 51572
baz::mScarlet-I	Houssin et al., 2021
ubi-his2av::mRFP	González lab
mira::mCherry	Ramat et al., 2017
ubi-bazΔLB::GFP	Kullmann and Krahn, 2018
ubi-bazΔOD::GFP	Kullmann and Krahn, 2018
ckd1as2	This study
UASz-bazWT::GFP	This study
UASz-bazS180A::GFP	This study
UASz-bazS180D::GFP	This study
Neur-GAL4	BDSC 80575
Pnr-GAL4	BDSC 3039
UAS-RFP RNAi	BDSC 67852
UAS-dl RNAi	BDSC 28032
cycB::GFP	BDSC 51568
cycB3::GFP	BDSC 91673
Neur-GAL4, UAS-Pon::RFP	Emery et al., 2005
delta::GFP	BDSC 59819
