# Supplementary figures and images for: A CDK1 phosphorylation site on Drosophila PAR-3 regulates neuroblast polarisation and sensory organ formation
Source: eLife journal article supplement (doi:10.7554/elife.97902), 2024-06-12

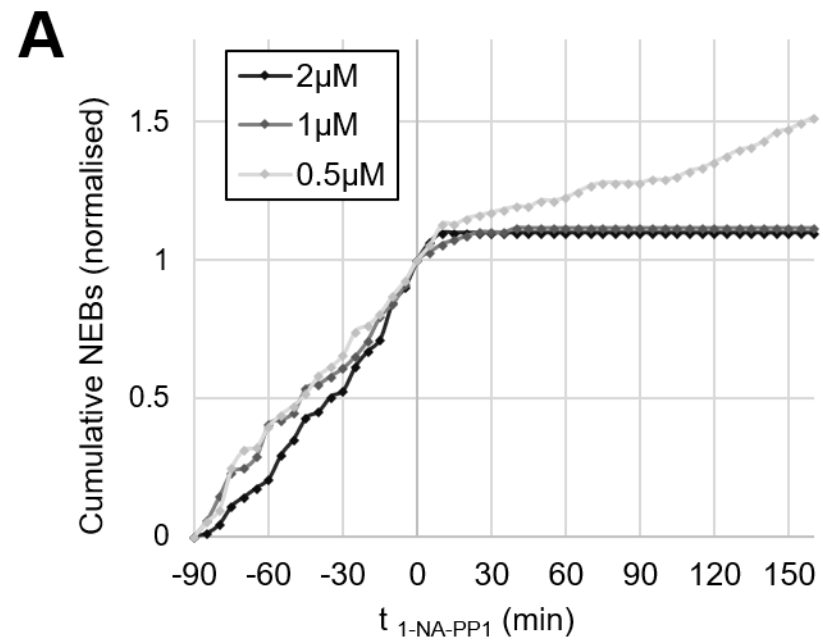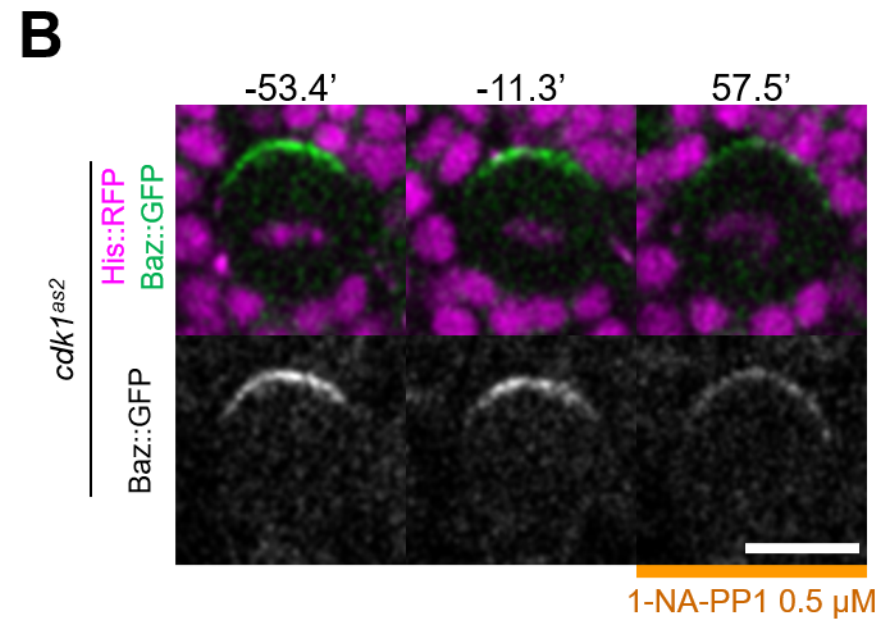

Supplement: supp [file elife-97902-supp-v1.zip]

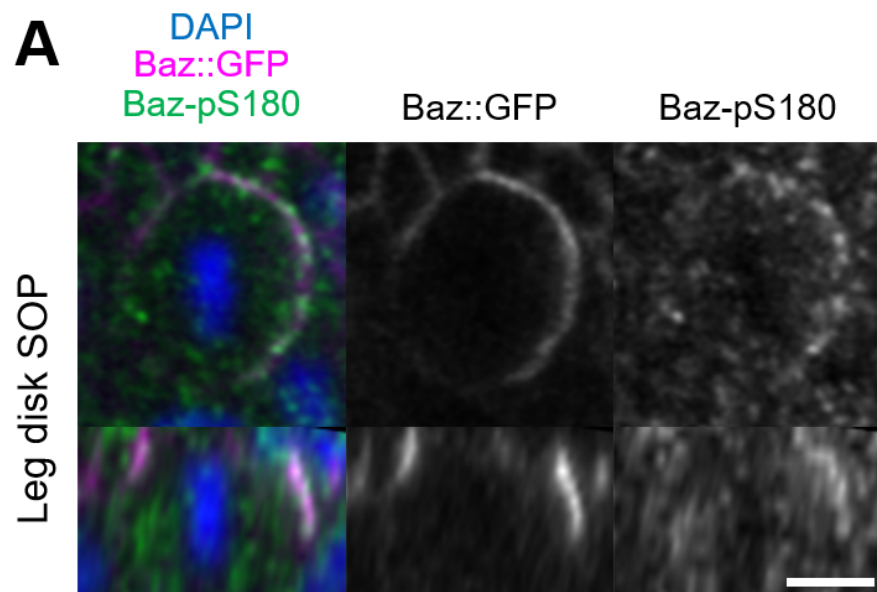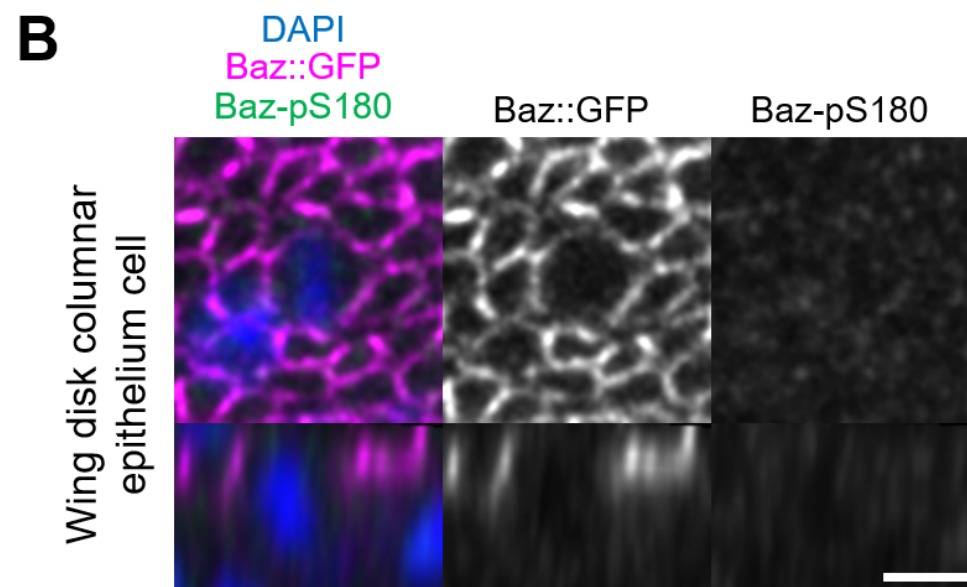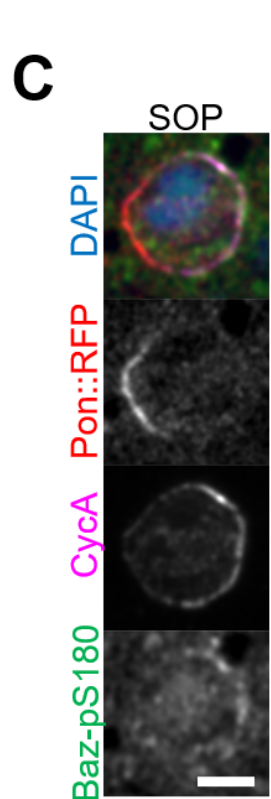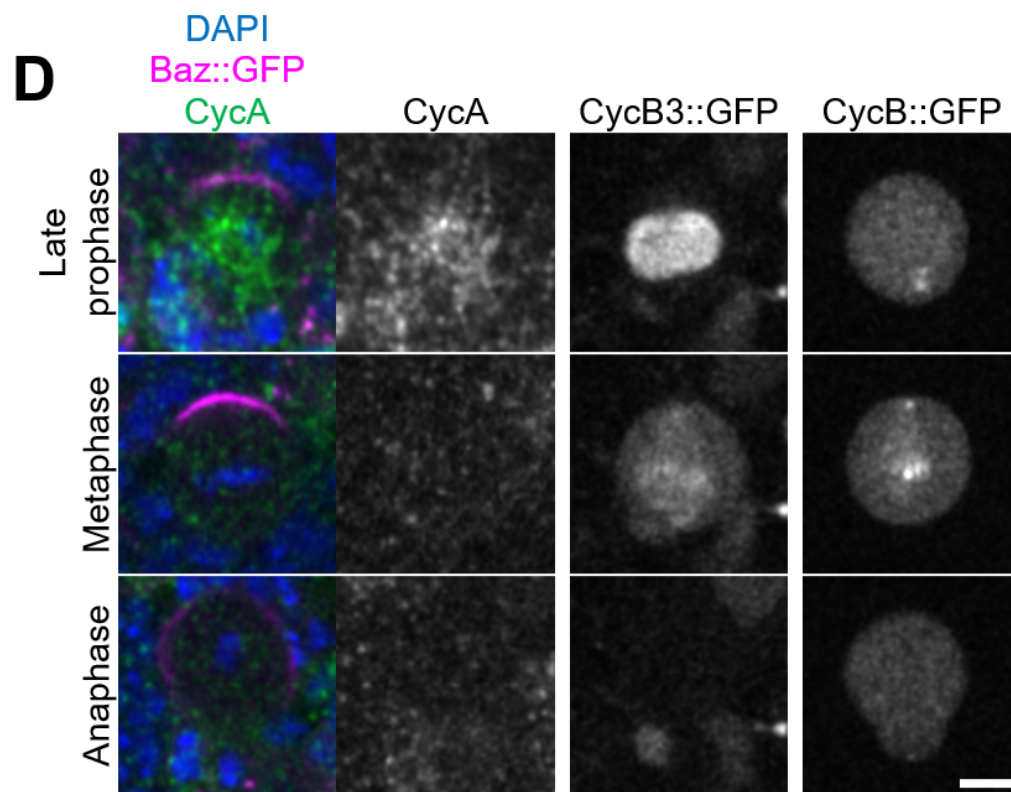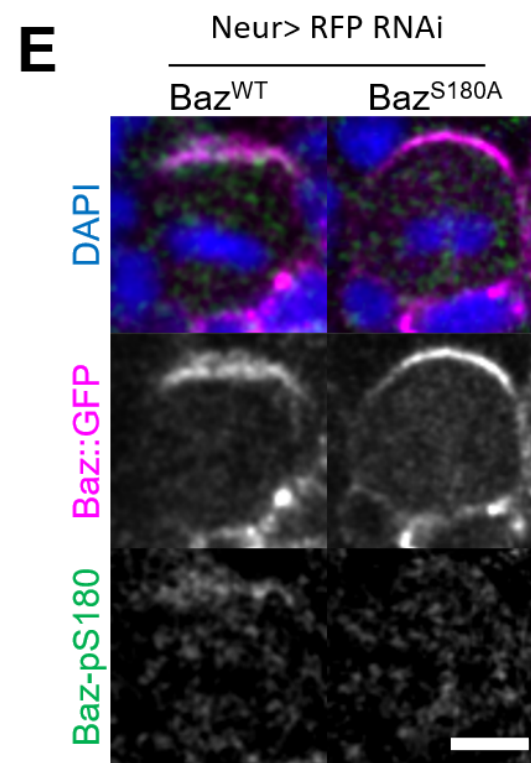

Supplement: supp [file elife-97902-supp-v1.zip]
